# Supplementary material for: Control of polymorphism in NaNbO3by hydrothermal synthesis
Source: Royal Society of Chemistry journal article supplement (doi:10.1039/b814601b), 2008-11-12
Supplement: b814601b.pdf [file b814601b.pdf]

## Supplementary Information for

### "Control of Polymorphism in NaNbO<sub>3</sub> by Hydrothermal Synthesis"

Deena R. Modeshia, Richard J. Darton, Sharon E. Ashbrook and Richard I. Walton

#### S1. Powder neutron diffraction structure refinement

##### Crystal data

|                                                |                                      |
|------------------------------------------------|--------------------------------------|
| Chemical formula                               | NaNbO <sub>3</sub>                   |
| Chemical formula weight (g mol <sup>-1</sup> ) | 163.89                               |
| Cell setting                                   | Rhombohedral                         |
| Space group                                    | $R\bar{3}$                           |
| <i>a</i> (Å)                                   | 5.3430(9)                            |
| <i>b</i> (Å)                                   | 5.3430(9)                            |
| <i>c</i> (Å)                                   | 15.6493(27)                          |
| $\alpha$ (°)                                   | 90                                   |
| $\beta$ (°)                                    | 90                                   |
| $\gamma$ (°)                                   | 120                                  |
| <i>V</i> (Å <sup>3</sup> )                     | 386.87(11)                           |
| Radiation type                                 | Neutron                              |
| Temperature (K)                                | 298                                  |
| Colour                                         | White                                |
| Data collection                                |                                      |
| Diffractionmeter                               | GEM                                  |
| Data collection method                         | Time-of-flight                       |
| Instrument location                            | ISIS, Rutherford Appleton Laboratory |
| Specimen mounting                              | 6mm Vanadium Can                     |
| Refinement                                     |                                      |
| R <sub>p</sub>                                 | 0.0479                               |
| R <sub>wp</sub>                                | 0.0472                               |
| Profile function                               | Pseudo-Voigt                         |
| Computer programmes                            |                                      |
| Structure refinement                           | GSAS (Larson & Von Dreele, 1986)     |

|    | x           | y            | z           | U <sub>iso</sub> |
|----|-------------|--------------|-------------|------------------|
| Na | 0.0         | 0.0          | 0.14291(10) | 0.0113(4)        |
| Nb | 0.0         | 0.0          | 0.35158(5)  | 0.00166(20)      |
| O  | 0.27024(10) | -0.05341(10) | 0.26155(4)  | 0.00499(15)      |

## S2 NMR experimental details

Spectra were recorded on a 400 MHz Bruker Avance spectrometer. For the  $^{23}\text{Na}$  the reported spectrum is the result of averaging 24 transients with recycle intervals of 4 s from a sample packed into 4-mm standard  $\text{ZrO}_2$  rotors and rotated at a rate of 10 kHz. For the  $^{93}\text{Nb}$  spectra, a spin-echo pulse sequence was used with pulses selective for the central transition. The spectrum is the result of averaging 1600 transients with recycle intervals of 1 s. The sample was packed into a 2.5-mm standard  $\text{ZrO}_2$  rotor and rotated at a rate of 33 kHz. On Figure 2b the red line in the  $^{93}\text{Nb}$  spectrum is that fitted to extract spectral parameters.

## S3 Variable Temperature powder XRD

A sample of ilmenite  $\text{NaNbO}_3$  was heated to 1000 °C in steps of 25°C on an MRI cell attached to a Siemens D5000 X-ray diffractometer. The sample was held at each temperature for 2 hours before each scan started. Data were measured using a  $\text{CuK}_\alpha$  source ( $\lambda_1=1.5405$  Å,  $\lambda_2=1.5443$  Å,  $\lambda_{\text{Average}}=1.5418$  Å) with a step size of 0.02 °2 $\theta$ .

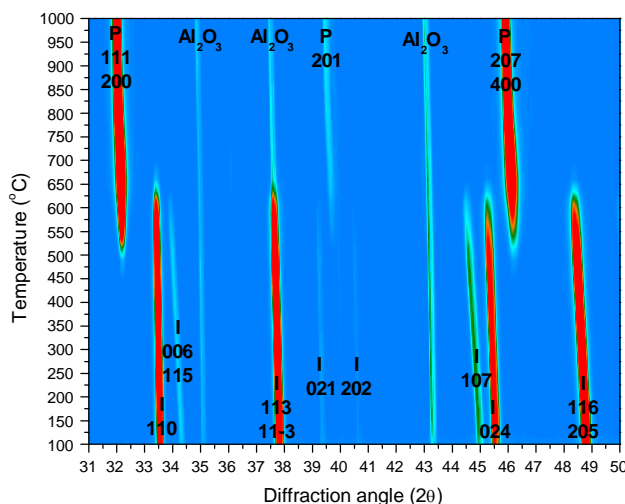

**Figure S3.1:** Contour map of powder XRD. Bragg peaks of the ilmenite and perovskite phase are labelled I and P, respectively, and the  $\text{Al}_2\text{O}_3$  peaks are due to the sample holder. The perovskite peaks are indexed on the high temperature tetragonal (P4/mbm) phase reported by Darlington and Knight.<sup>1</sup>

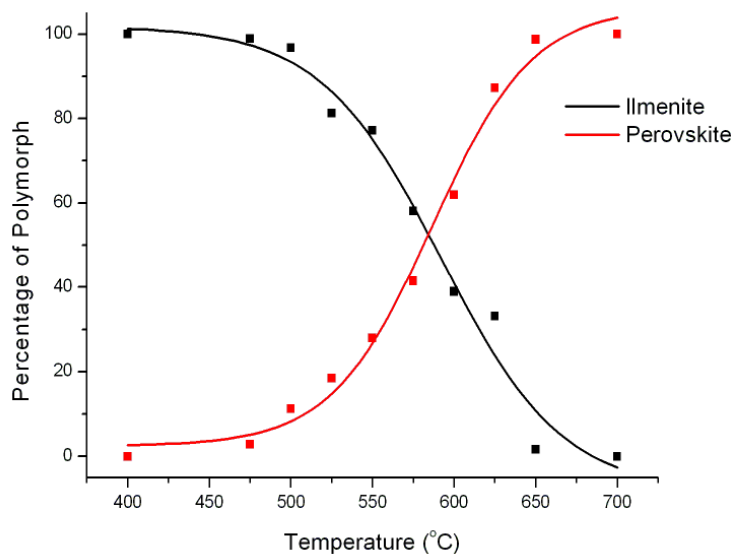

**Figure S3.2:** Percentage conversion of ilmenite to perovskite by peak area analysis of XRD data.

#### S4: EDXRD data

EDXRD experiments were performed on Station 16.4 of the Daresbury SRS with incident X-rays over the energy range 20 to 80 keV. Data are recorded using a fixed, three-element solid-state detector that permits three, overlapping regions of diffraction data to be measured simultaneously to maximise the amount of structural information measured.<sup>2</sup> Data were recorded from reactions in a 25 ml Teflon-lined stainless steel autoclave with windows thinned to 0.25 mm.<sup>3</sup> In the spectra below the black traces are from a detector at  $2\theta = 1.81^\circ$  and the red traces from a detector at  $2\theta = 4.7^\circ$ . In the energy dispersive diffraction geometry the  $d$  spacing of a Bragg peak (in Å) is related to its observed energy,  $E$ , (in keV) by  $d = 6.19926/E\sin\theta$ .

The shift of the Teflon peak in the data presented in Figure 3 is due to thermal expansion and provides a measure of when reaction temperature is reached.

Bragg peaks of the crystalline phases observed were identified using published crystal structures. Peaks labelled \* are due to the reaction cell.

| Phase                                                                                 | Crystal Structure Reference |
|---------------------------------------------------------------------------------------|-----------------------------|
| Nb <sub>2</sub> O <sub>5</sub>                                                        | 4                           |
| Na <sub>7</sub> (H <sub>3</sub> O)Nb <sub>6</sub> O <sub>19</sub> .14H <sub>2</sub> O | 5                           |
| Na <sub>2</sub> Nb <sub>2</sub> O <sub>6</sub> .nH <sub>2</sub> O                     | 6                           |
| Perovskite NaNbO <sub>3</sub>                                                         | 7                           |
| Ilmenite NaNbO <sub>3</sub>                                                           | This work                   |

- 1 C. N. W. Darlington and K. S. Knight, *Acta Cryst. B*, 1999, **55**, 24.
- 2 G. Muncaster, A. T. Davies, G. Sankar, C. R. A. Catlow, J. M. Thomas, S. L. Colston, P. Barnes, R. I. Walton, and D. O'Hare, *Phys. Chem., Chem. Phys.*, 2000, **2**, 3523.
- 3 J. S. O. Evans, R. J. Francis, D. O' Hare, S. J. Price, S. M. Clark, J. Flaherty, J. Gordon, A. Nield, and C. C. Tang, *Review of Scientific Instruments*, 1995, **66**, 2442.
- 4 K. Kato and S. Tamura, *Acta Crystallogr. B*, 1975, **31**, 673.
- 5 A. Goiffon, E. Philippot, and M. Maurin, *Rev. Chim. Min.*, 1980, **17**, 466.
- 6 H. W. Xu, M. Nyman, T. M. Nenoff, and A. Navrotsky, *Chem. Mater.*, 2004, **16**, 2034.
- 7 C. N. W. Darlington and K. S. Knight, *Physica B*, 1999, **266**, 368.

S4.1: Perovskite crystallisation

- 1g Nb<sub>2</sub>O<sub>5</sub>
- 8mL (1.5M) NaOH
- 240 °C

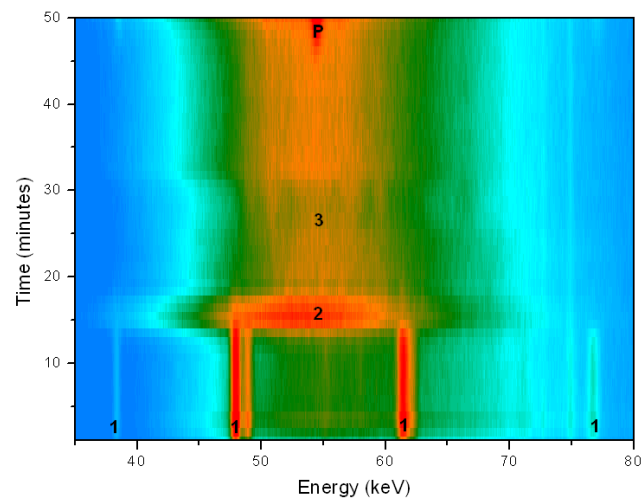

Figure S4.1: Contour map from detector at 4.7° 2θ for perovskite crystallisation (labels as for Figure 3)

Time: 1minute  
Phase(s) Present: Nb<sub>2</sub>O<sub>5</sub>

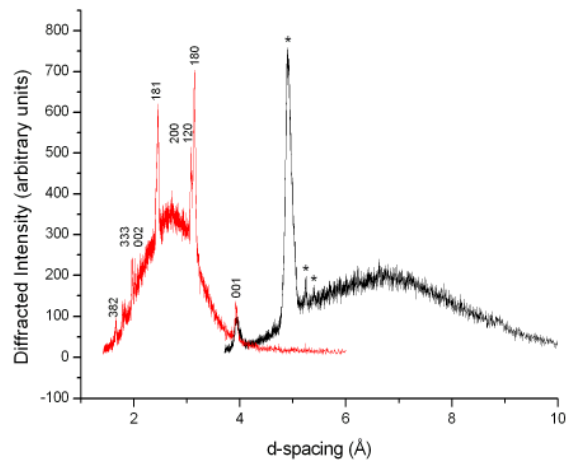

| h | k  | l | d <sub>calc</sub> /Å | d <sub>obs</sub> /Å |
|---|----|---|----------------------|---------------------|
| 0 | 0  | 1 | 3.93                 | 3.931               |
| 1 | 8  | 0 | 3.15                 | 3.135               |
| 2 | 0  | 0 | 3.09                 | 3.083               |
| 2 | 1  | 0 | 3.07                 |                     |
| 1 | 8  | 1 | 2.46                 | 2.455               |
| 6 | 3  | 3 | 2.013                | 2.013               |
| 0 | 0  | 2 | 1.969                | 1.964               |
| 0 | 16 | 0 | 1.832                | 1.830               |
| 3 | 8  | 2 | 1.669                | 1.662               |
| 3 | 8  | 1 | 1.632                | 1.630               |

Time: 17 minutes

Phase(s) Present:  $\text{Na}_7(\text{H}_3\text{O})\text{Nb}_6\text{O}_{19} \cdot 14\text{H}_2\text{O}$

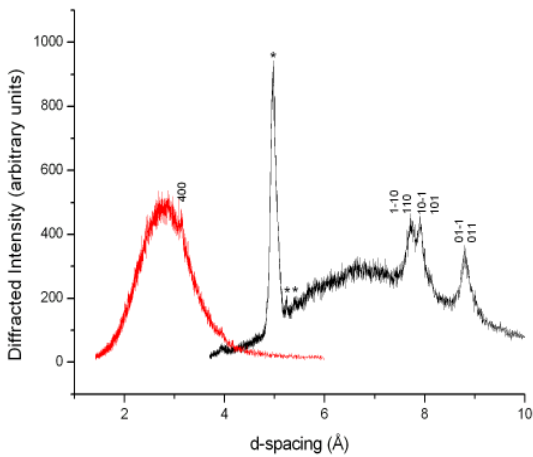

| h | k  | l  | d <sub>calc</sub> /Å | d <sub>obs</sub> /Å |
|---|----|----|----------------------|---------------------|
| 0 | 1  | -1 | 8.786                | 8.817               |
| 0 | 1  | 1  |                      |                     |
| 1 | 0  | -1 | 7.897                | 7.913               |
| 1 | 0  | 1  |                      |                     |
| 1 | -1 | 0  | 7.754                | 7.720               |
| 1 | 1  | 0  |                      |                     |
| 4 | 0  | 0  | 2.518                | 2.515               |

Time: 30 minutes

Phase(s) Present:  $\text{Na}_2\text{Nb}_2\text{O}_6 \cdot n\text{H}_2\text{O}$

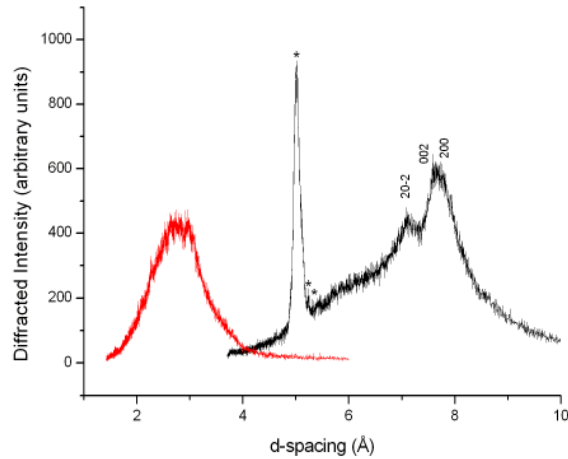

| h | k | l  | d <sub>calc</sub> /Å | d <sub>obs</sub> /Å |
|---|---|----|----------------------|---------------------|
| 2 | 0 | 0  | 7.892                | 7.843               |
| 0 | 0 | 2  | 7.537                | 7.618               |
| 2 | 0 | -2 | 7.026                | 7.106               |

Time: 50 minutes

Phase(s) Present: Perovskite  $\text{NaNbO}_3$

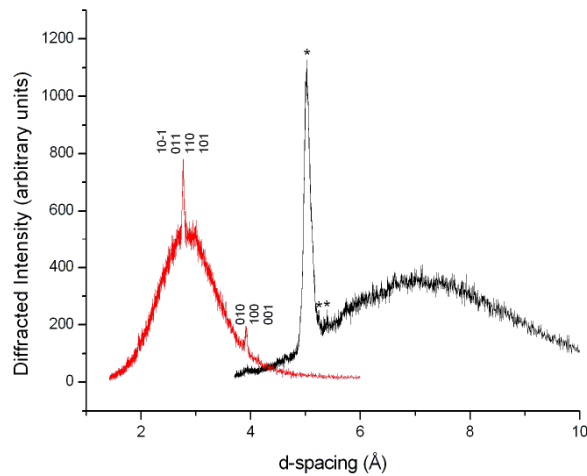

| h | k | l  | d <sub>calc</sub> /Å | d <sub>obs</sub> /Å |
|---|---|----|----------------------|---------------------|
| 0 | 1 | 0  | 3.920                | 3.927               |
| 1 | 0 | 0  |                      |                     |
| 0 | 0 | 1  |                      |                     |
| 1 | 0 | -1 | 2.779                | 2.767               |
| 0 | 1 | 1  | 2.771                |                     |
| 1 | 1 | 0  | 2.771                |                     |
| 1 | 0 | 1  | 2.764                |                     |

S4.2: Ilmenite crystallisation

- 1g Nb<sub>2</sub>O<sub>5</sub>
- 8mL (1M) NaOH
- 240 °C

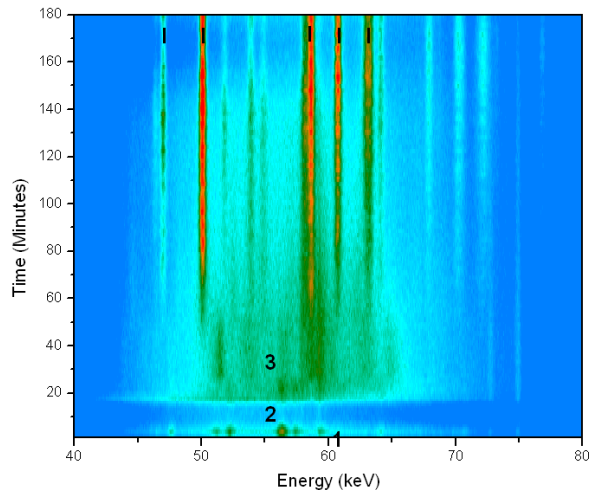

Figure S4.2: Contour map from detector at 4.7 °2θ for perovskite crystallisation (labels as for Figure 3)

Time: 1 minute  
Phase(s) Present: Nb<sub>2</sub>O<sub>5</sub>

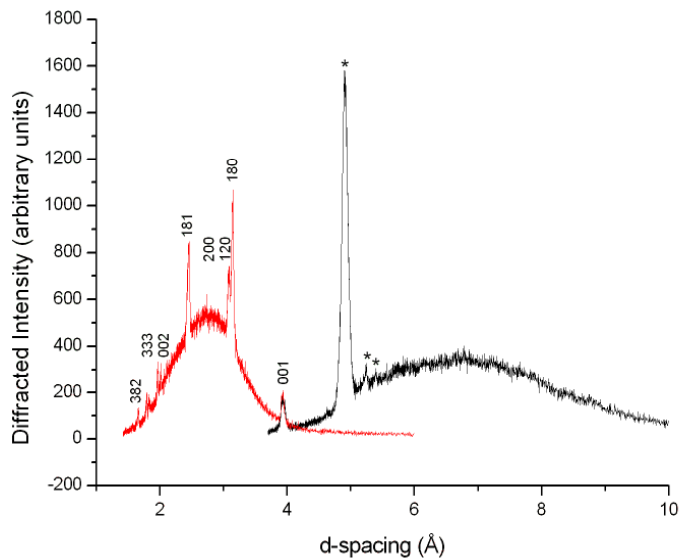

| h | k | l | d <sub>calc</sub> /Å | d <sub>obs</sub> /Å |
|---|---|---|----------------------|---------------------|
| 0 | 0 | 1 | 3.930                | 3.93                |
| 1 | 8 | 0 | 3.150                | 3.144               |
| 2 | 0 | 0 | 3.090                | 3.084               |
| 2 | 1 | 0 | 3.070                |                     |
| 1 | 8 | 1 | 2.460                | 2.453               |
| 6 | 3 | 3 | 2.013                | 2.012               |
| 0 | 0 | 2 | 1.969                | 1.963               |
| 3 | 8 | 2 | 1.669                | 1.661               |
| 3 | 8 | 1 | 1.632                | 1.628               |

Time: 18 minutes

Phase(s) Present:  $\text{Na}_7(\text{H}_3\text{O})\text{Nb}_6\text{O}_{19} \cdot 14\text{H}_2\text{O}$

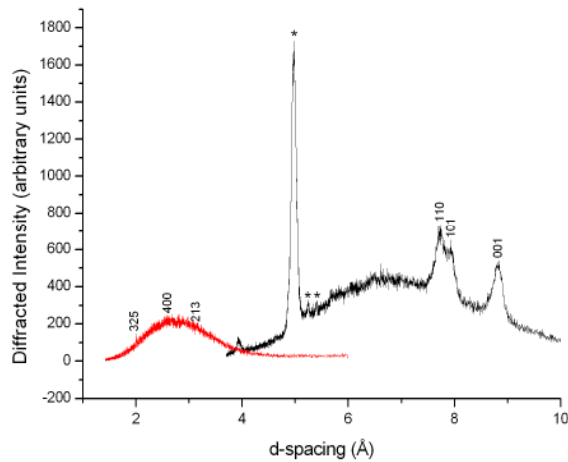

| h | k | l | d <sub>calc</sub> /Å | d <sub>obs</sub> /Å |
|---|---|---|----------------------|---------------------|
| 0 | 1 | 1 | 8.758                | 8.895               |
| 1 | 0 | 1 | 7.897                | 7.993               |
| 1 | 1 | 0 | 7.754                | 7.788               |
| 2 | 1 | 3 | 3.134                | 3.223               |
| 4 | 0 | 0 | 2.518                | 2.513               |
| 3 | 2 | 5 | 1.923                | 1.919               |

Time: 25-35 minutes

$\text{Na}_2\text{Nb}_2\text{O}_6 \cdot n\text{H}_2\text{O}$

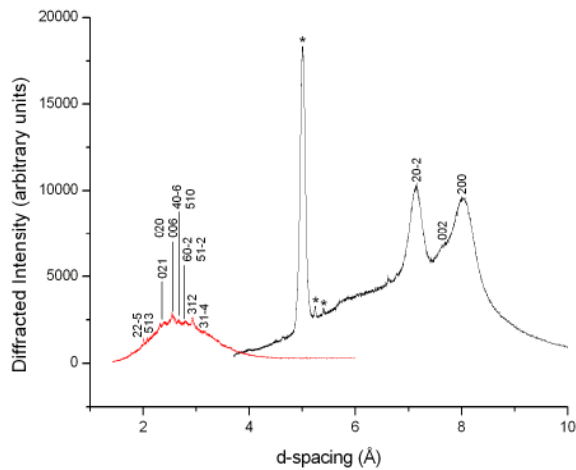

| h | k | l  | d <sub>calc</sub> /Å | d <sub>obs</sub> /Å |
|---|---|----|----------------------|---------------------|
| 2 | 0 | 0  | 7.792                | 8.037               |
| 0 | 0 | 2  | 7.537                | 7.622               |
| 2 | 0 | -2 | 7.026                | 7.141               |
| 3 | 1 | 2  | 2.950                | 2.959               |
| 6 | 0 | -2 | 2.836                | 2.927               |
| 1 | 1 | 4  | 2.796                | 2.800               |
| 5 | 1 | -4 | 2.637                | 2.667               |
| 6 | 0 | 0  | 2.597                | 2.581               |
| 0 | 2 | 0  | 2.515                | 2.540               |
| 0 | 2 | 1  | 2.480                | 2.497               |
| 2 | 2 | 0  | 2.393                | 2.392               |
| 2 | 2 | 1  | 2.319                | 2.319               |
| 2 | 0 | 6  | 2.150                | 2.146               |
| 0 | 2 | 4  | 2.092                | 2.072               |
| 2 | 2 | -5 | 2.000                | 2.012               |
| 7 | 1 | -6 | 1.982                | 1.970               |
| 0 | 2 | 6  | 1.777                | 1.788               |

Time: 60-80 minutes

Phase(s) Present: Unknown Phase (o) and Ilmenite  $\text{NaNbO}_3$

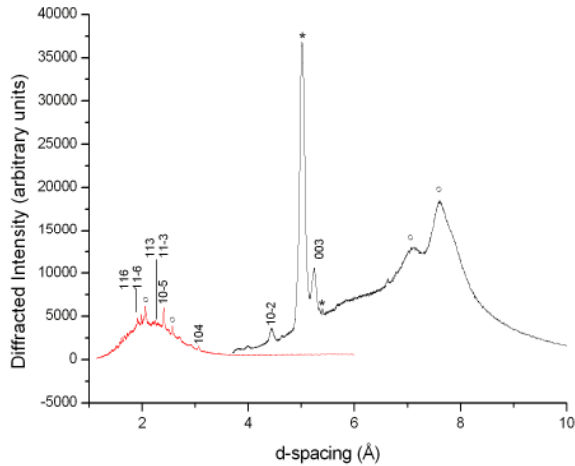

| <b>h</b> | <b>k</b> | <b>l</b> | <b>Phase</b>                | <b>d<sub>calc</sub>/Å</b> | <b>d<sub>obs</sub>/Å</b> |
|----------|----------|----------|-----------------------------|---------------------------|--------------------------|
|          |          |          | Unknown Phase               |                           | 8.140                    |
|          |          |          | Unknown Phase               |                           | 7.797                    |
|          |          |          | Unknown Phase               |                           | 7.588                    |
|          |          |          | Unknown Phase               |                           | 7.089                    |
|          |          |          | Unknown Phase               |                           | 5.247                    |
| 0        | 0        | 3        | Ilmenite NaNbO <sub>3</sub> | 5.204                     | 5.019                    |
|          |          |          | Unknown Phase               |                           | 4.440                    |
| 1        | 0        | -2       | Ilmenite NaNbO <sub>3</sub> | 3.976                     | 3.991                    |
|          |          |          | Unknown Phase               |                           | 3.831                    |
|          |          |          | Unknown Phase               |                           | 3.647                    |
|          |          |          | Unknown Phase               |                           | 3.381                    |
|          |          |          | Unknown Phase               |                           | 3.209                    |
| 1        | 0        | 4        | Ilmenite NaNbO <sub>3</sub> | 2.981                     | 3.009                    |
|          |          |          | Unknown Phase               |                           | 2.872                    |
|          |          |          | Unknown Phase               |                           | 2.797                    |
| 1        | 0        | -5       | Ilmenite NaNbO <sub>3</sub> | 2.587                     | 2.595                    |
|          |          |          | Unknown Phase               |                           | 2.570                    |
|          |          |          | Unknown Phase               |                           | 2.542                    |
|          |          |          | Unknown Phase               |                           | 2.481                    |
| 1        | 1        | 3        | Ilmenite NaNbO <sub>3</sub> | 2.374                     | 2.387                    |
| 1        | 1        | -3       |                             |                           |                          |
|          |          |          | Unknown Phase               |                           | 2.350                    |
|          |          |          | Unknown Phase               |                           | 2.219                    |
|          |          |          | Unknown Phase               |                           | 2.146                    |
|          |          |          | Unknown Phase               |                           | 2.090                    |
|          |          |          | Unknown Phase               |                           | 2.072                    |
| 2        | 0        | -4       | Ilmenite NaNbO <sub>3</sub> | 1.998                     | 2.011                    |
|          |          |          | Unknown Phase               |                           | 1.966                    |
|          |          |          | Unknown Phase               |                           | 1.912                    |
| 1        | 1        | 6        | Ilmenite NaNbO <sub>3</sub> | 1.863                     |                          |
| 1        | 1        | -6       |                             |                           | 1.879                    |
|          |          |          | Unknown Phase               |                           | 1.786                    |
|          |          |          | Unknown Phase               |                           | 1.775                    |
|          |          |          | Unknown Phase               |                           | 1.754                    |
|          |          |          | Unknown Phase               |                           | 1.727                    |
|          |          |          | Unknown Phase               |                           | 1.625                    |
| 1        | 2        | -4       | Ilmenite NaNbO <sub>3</sub> | 1.594                     | 1.598                    |
| 2        | 1        | 4        |                             |                           |                          |

Time: 180 minutes  
Phase(s) Present: Ilmenite  $\text{NaNbO}_3$

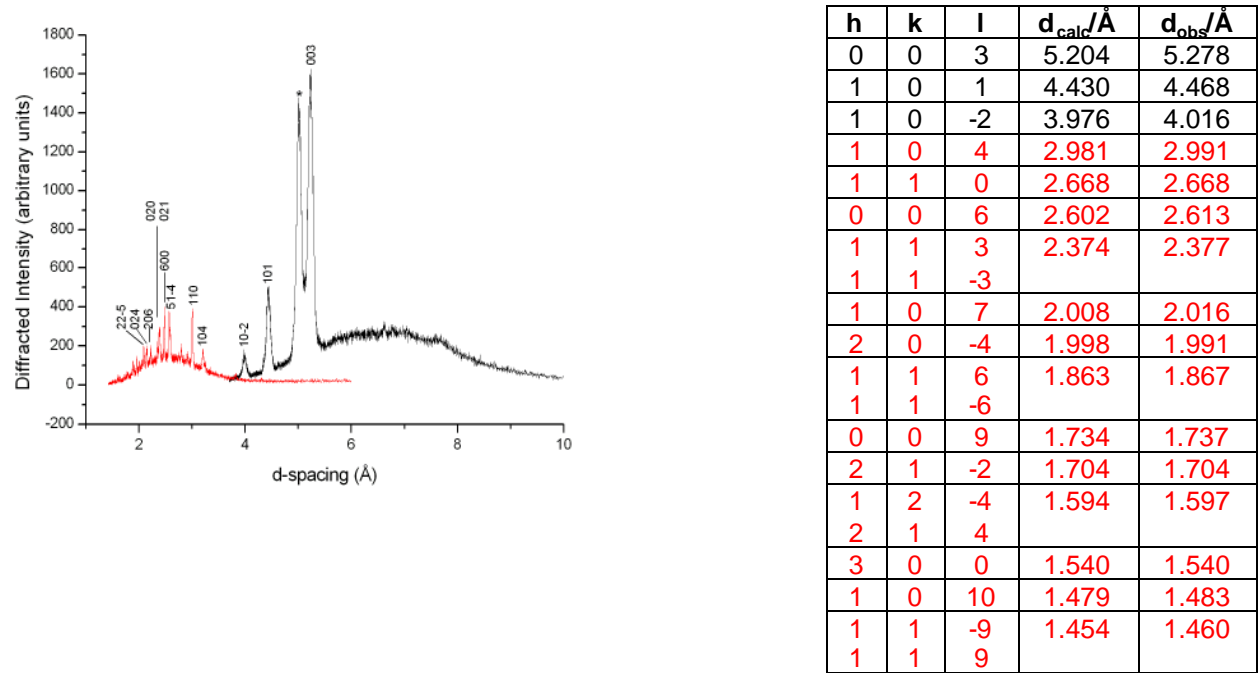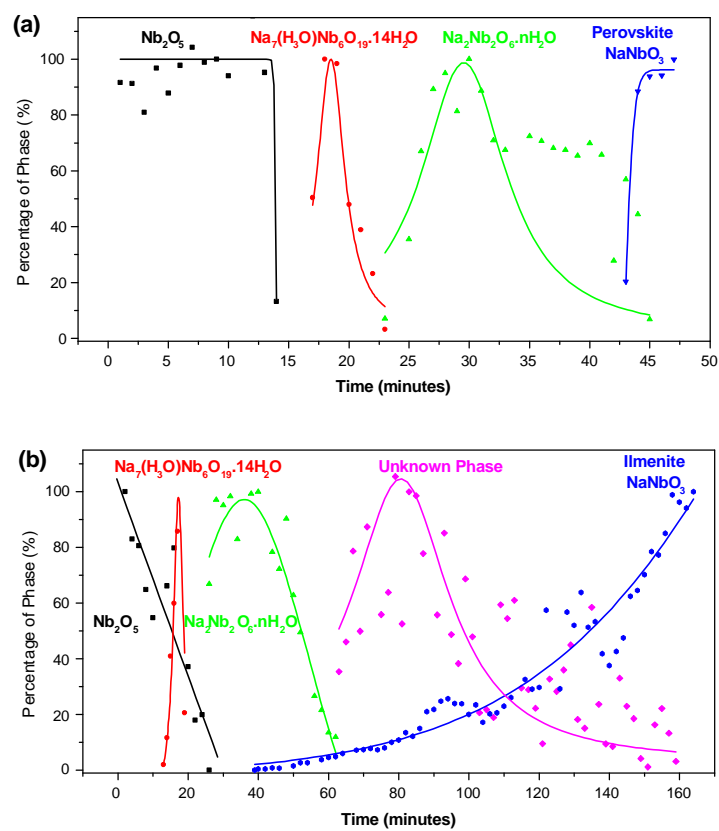

Figure S4.3: Evolution of normalised Bragg peak areas in the EDXRD experiments for (a) reaction performed at with 1.5 M NaOH and (b) with 1 M NaOH. Lines are for guidance only.

### S5: TGA data from ilmenite $\text{NaNbO}_3$

Data were recorded using under a flow of air using a Perkin Elmer Pyris Diamond TG/DTA apparatus to 700 °C with a heating rate of 5 °C min<sup>-1</sup>.

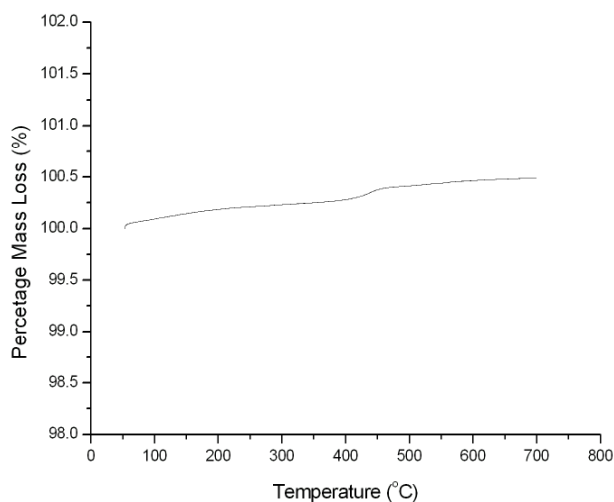

*Figure S5.1: TGA trace of ilmenite  $\text{NaNbO}_3$*

### S6: IR data from ilmenite $\text{NaNbO}_3$

Data were recorded from a freshly dried sample of the material (50 °C is air). The sample was studied undiluted using a Perkin Elmer Paragon 1000 FT-IR spectrometer in attenuated total reflection mode. This precludes the use of a diluent and so avoids contamination with water-containing material. The spectrum shows no features due to water or hydroxide.

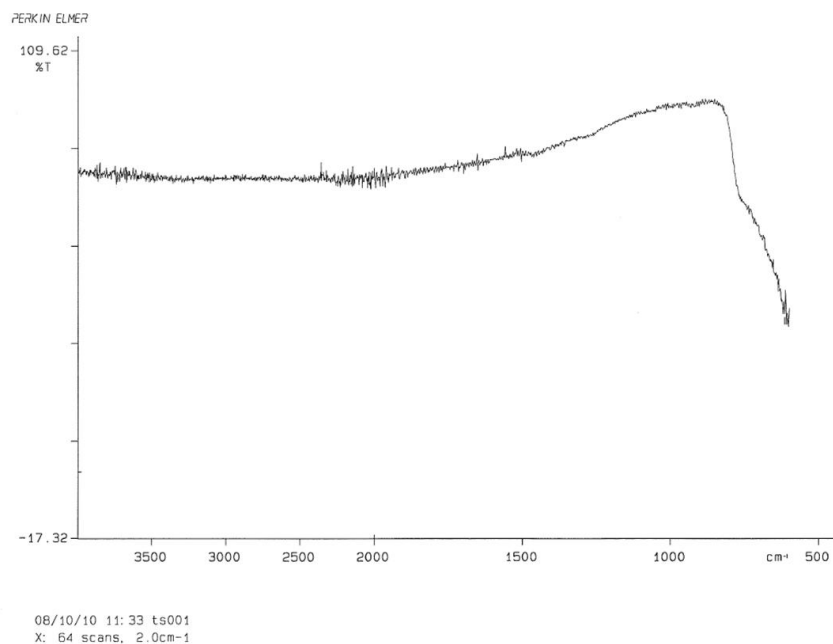

*Figure S6.1: IR spectrum of ilmenite  $\text{NaNbO}_3$*

**S7:  $^1\text{H}$  NMR data from ilmenite  $\text{NaNbO}_3$**

The dominant signal in the  $^1\text{H}$  NMR spectrum is a broad feature from the rotor and /or probe (usually not observed and part of the background of a typical spectrum of a hydrogen-containing sample). Weak additional features are due to additional contaminant water in the rotor, probe or sample, since they are seen even in anhydrous materials that have been prepared at extreme temperatures. As an example, the spectrum from  $\text{Mg}_2\text{SiO}_4$ , measured under identical conditions using the same rotor, is shown and this shows the same level of proton background, despite having been synthesised with an annealing step at  $1500^\circ\text{C}$ .<sup>8</sup>

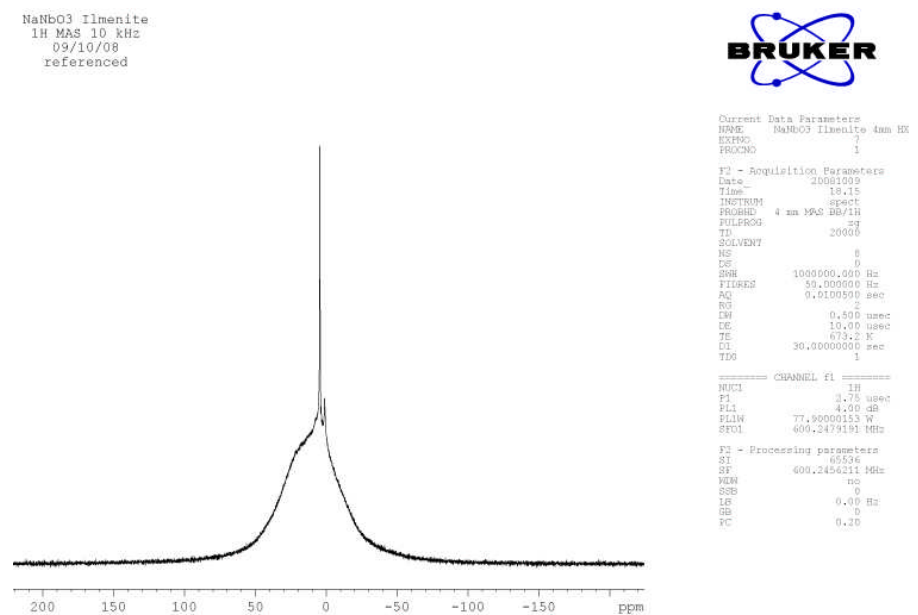

**Figure S7.1:  $^1\text{H}$  NMR spectrum of ilmenite  $\text{NaNbO}_3$ .**

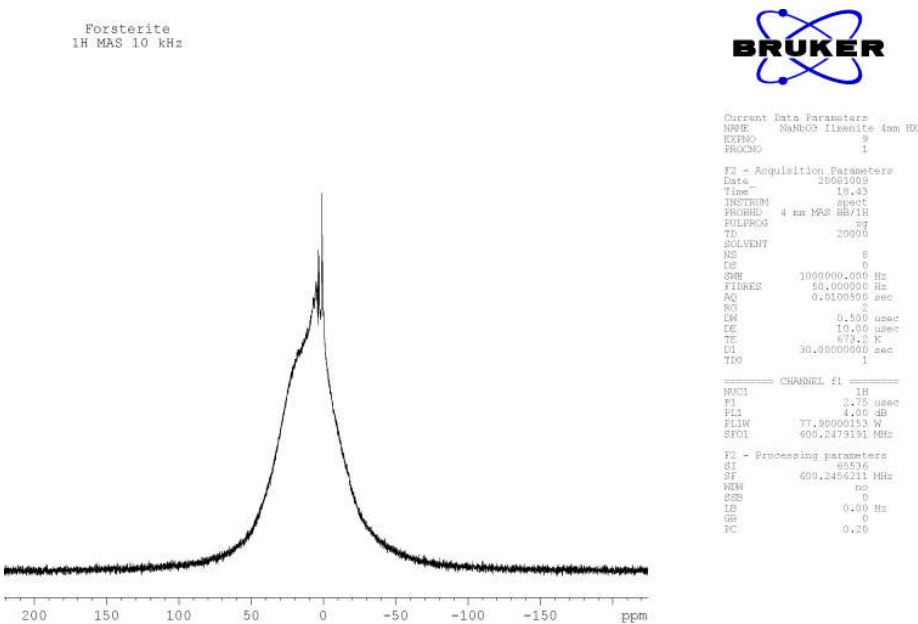

**Figure S7.2:  $^1\text{H}$  NMR spectrum of  $\text{Mg}_2\text{SiO}_4$**

8. S.E. Ashbrook, A.J. Berry and S. Wimperis, *Amer. Mineral.* 1999, **84**, 1191.
